# Supplementary material for: Synthesis, structure and spectroelectrochemistry of hybrid metal(iv)phthalocyaninato-capped 3d-metal pyrazoloximates as prospective precursors of stimuli-induced (responsive) single-molecule magnets, logic gates and qubits
Source: Royal Society of Chemistry journal article supplement (doi:10.1039/d4nj02908a), 2024-01-01
Supplement: d4nj02908a1.pdf [file d4nj02908a1.pdf]

**Supporting Information**  
**for**  
**Synthesis, structure and (spectro)electrochemistry of hybrid**  
**metal(IV)phthalocyaninato-capped 3d-metal pyrazoloximates as prospective**  
**precursors of ET and/or optically operated stimuli-induced and stimuli-**  
**responsive single-molecule magnets, logic gates and qubits**

Svetlana A. Belova,<sup>a</sup> Semyon V. Dudkin,<sup>a</sup> Alexander S. Belov,<sup>a</sup> Anastasia A. Danshina,<sup>a,c</sup> Pavel V. Dorovatovskii,<sup>d</sup> Yulia H. Budnikova,<sup>e</sup> Vera V. Khrizanforova,<sup>e</sup> Svetlana Yu. Bratskaya,<sup>f</sup> Denis V. Balatskiy,<sup>f</sup> Yan Z. Voloshin<sup>a,b</sup>

<sup>a</sup>*Nesmeyanov Institute of Organoelement Compounds of the Russian Academy of Sciences, Vavilova str., bld. 1, 119334 Moscow, Russia*

<sup>b</sup>*Kurnakov Institute of General and Inorganic Chemistry of the Russian Academy of Sciences, 31 Leninsky pr., 119991 Moscow, Russia*

<sup>c</sup>*Moscow Center for Advanced Studies, 20 Kulakova Str., 123592, Moscow, Russia*

<sup>d</sup>*NRC Kurchatov Institute, 1 Kurchatova pl., 123098 Moscow, Russia*

<sup>e</sup>*Arbuzov Institute of Organic and Physical Chemistry of the Russian Academy of Sciences, 8 Arbuzov st., 420088 Kazan, Russia*

<sup>f</sup>*Institute of Chemistry, Far Eastern Branch of the Russian Academy of Sciences, 159 100-letiya Vladivostoka pr., 690022 Vladivostok, Russia*

\*Corresponding author E-mail: [voloshin@ineos.ac.ru](mailto:voloshin@ineos.ac.ru), [voloshin@igic.ras.ru](mailto:voloshin@igic.ras.ru)

## Spectral data

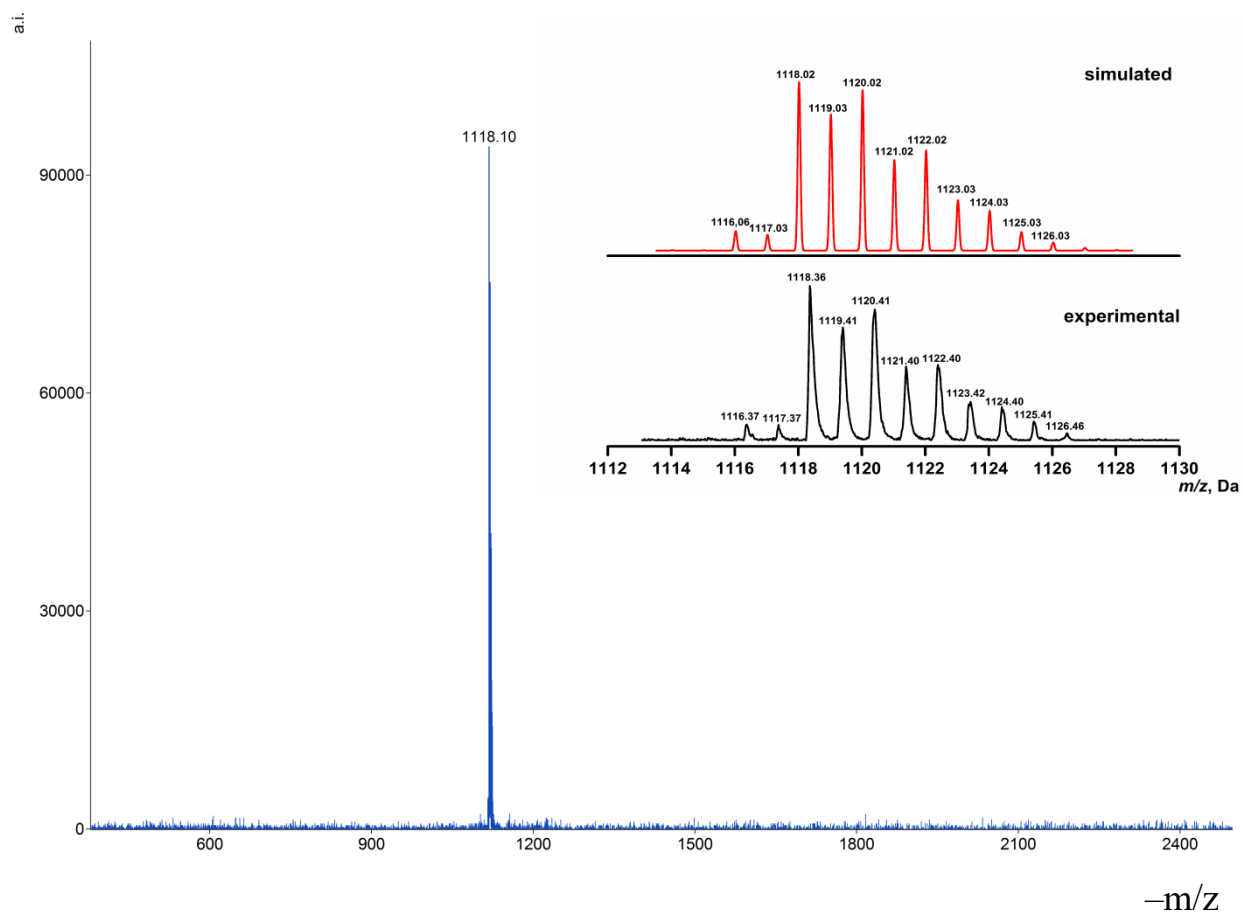

**Fig. S1.** MALDI-TOF mass spectrum of the hybrid complex  $[\text{Fe}(\text{PzOx})_3(\text{ZrPc})\text{Cl}]$  in the negative range. Inset: the experimental and the theoretically calculated isotopic distribution of the peak of its formed anionic cluster.

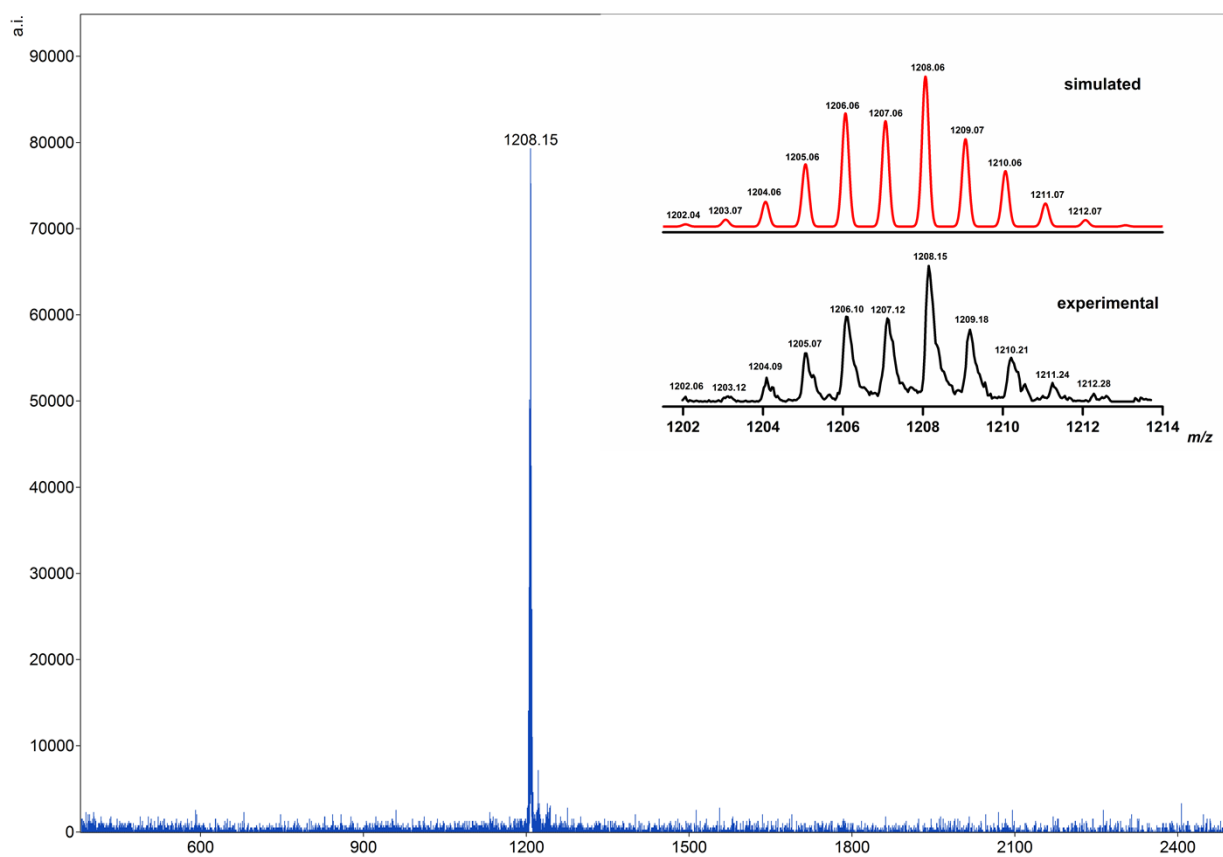

–m/z

**Fig. S2.** MALDI-TOF mass spectrum of the hybrid complex  $[\text{Fe}(\text{PzOx})_3(\text{HfPc})\text{Cl}]$  in the negative range. Inset: the experimental and the theoretically calculated isotopic distribution of the peak of its formed anionic cluster.

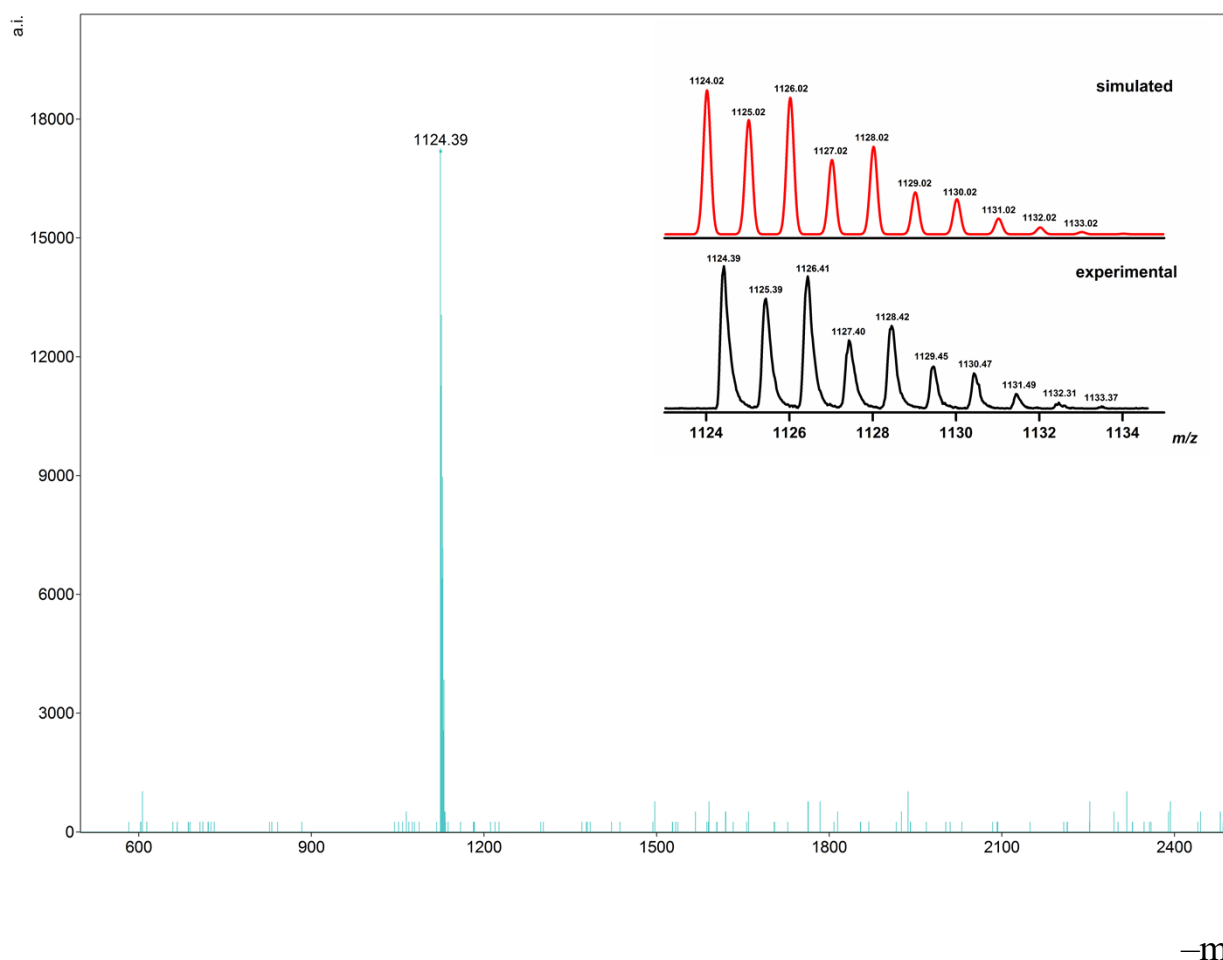

**Fig. S3.** MALDI-TOF mass spectrum of the hybrid complex  $[\text{Co}(\text{PzOx})_3(\text{ZrPc})\text{Cl}]\text{Cl}$  in the negative range. Inset: the experimental and the theoretically calculated isotopic distribution of the peak of its formed anionic cluster.

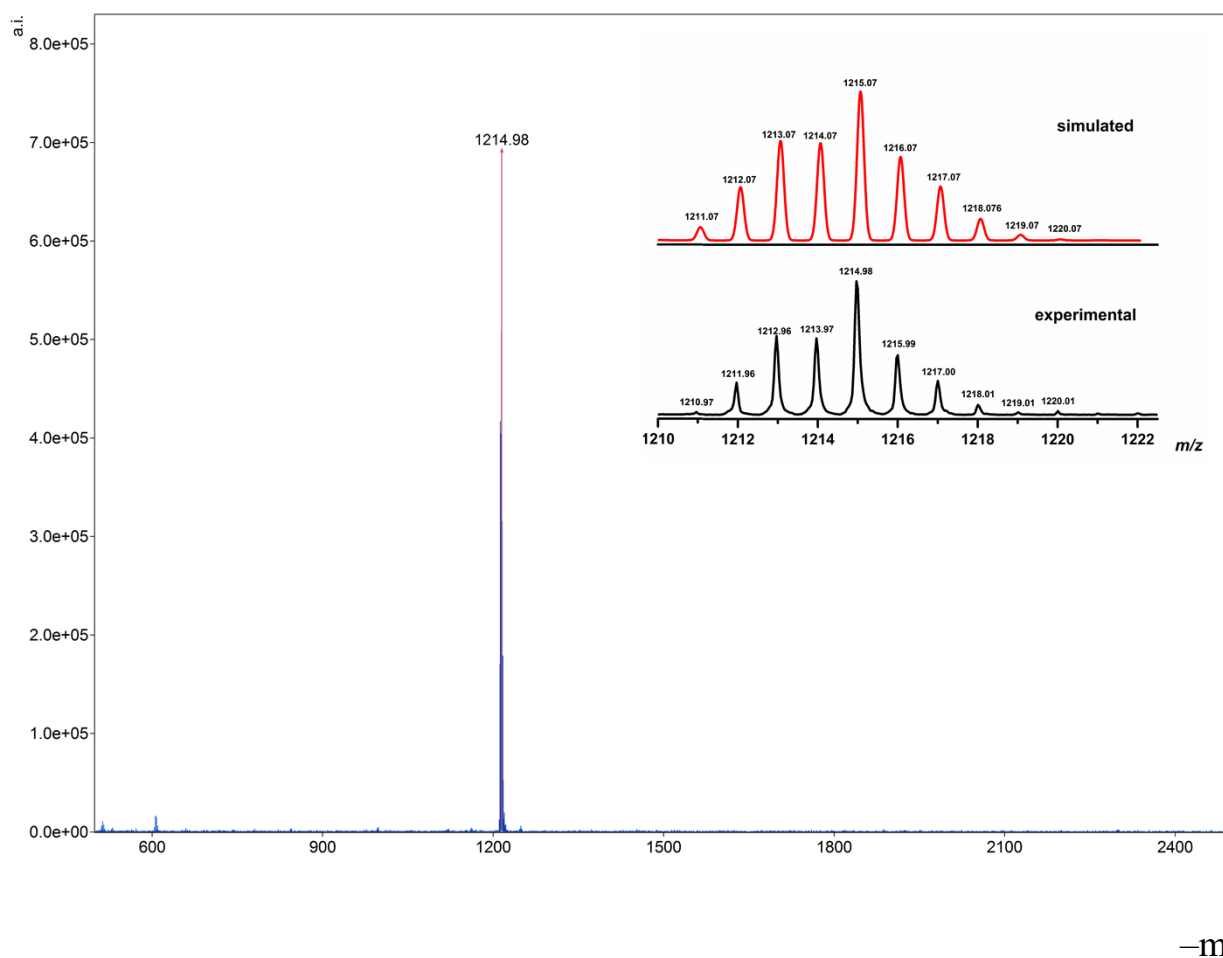

**Fig. S4.** MALDI-TOF mass spectrum of the hybrid complex  $[\text{Co}(\text{PzOx})_3(\text{HfPc})\text{Cl}]\text{Cl}$  in the negative range. Inset: the experimental and the theoretically calculated isotopic distribution of the peak of its formed anionic cluster.

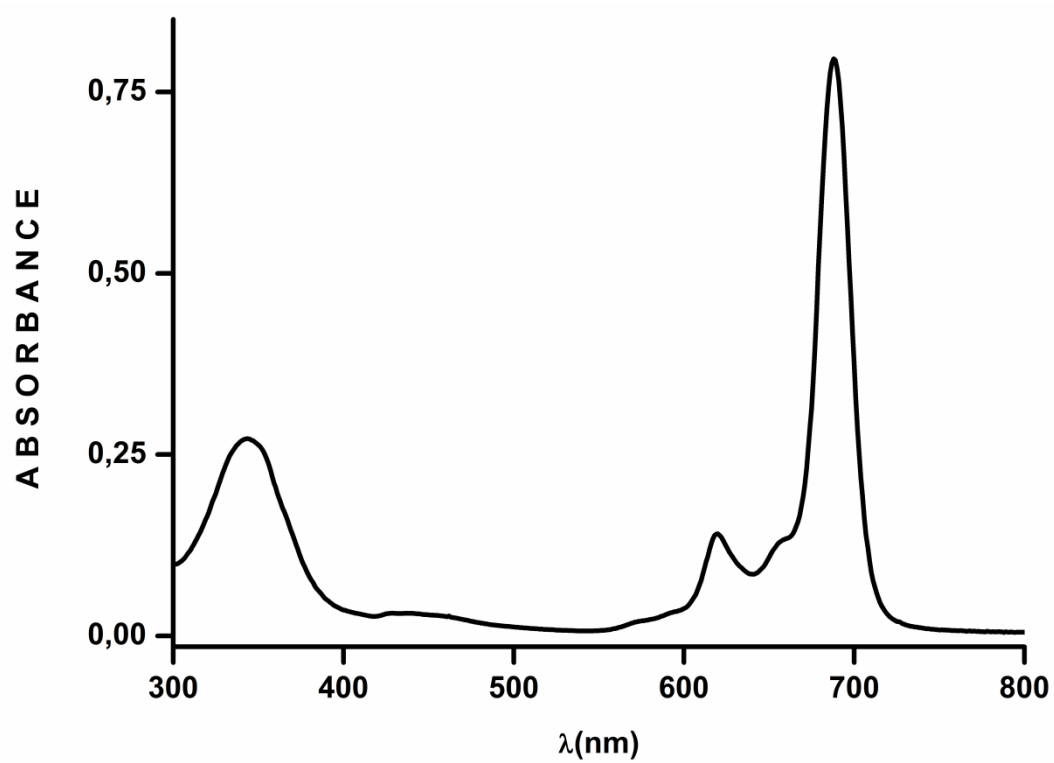

**Fig. S5.** Solution UV-vis spectrum of the complex [Fe(PzOx)<sub>3</sub>(HfPc)Cl] in DMSO.

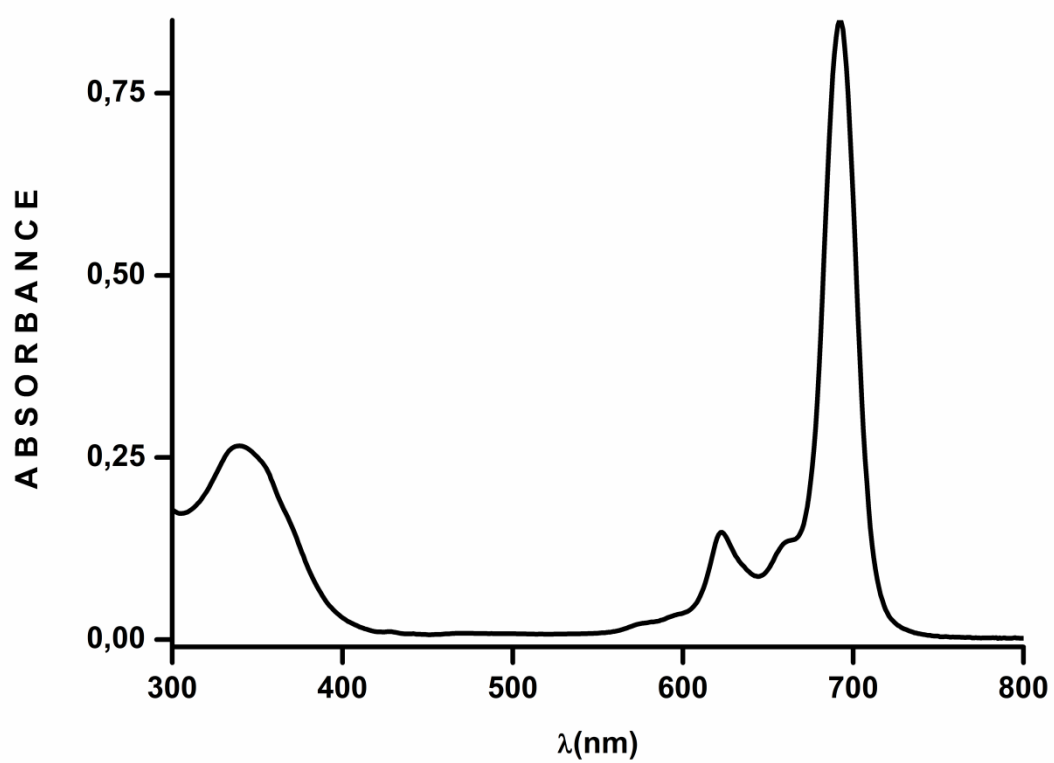

**Fig. S6.** Solution UV-vis spectrum of the complex [Co(PzOx)<sub>3</sub>(HfPc)Cl]Cl in DMSO.

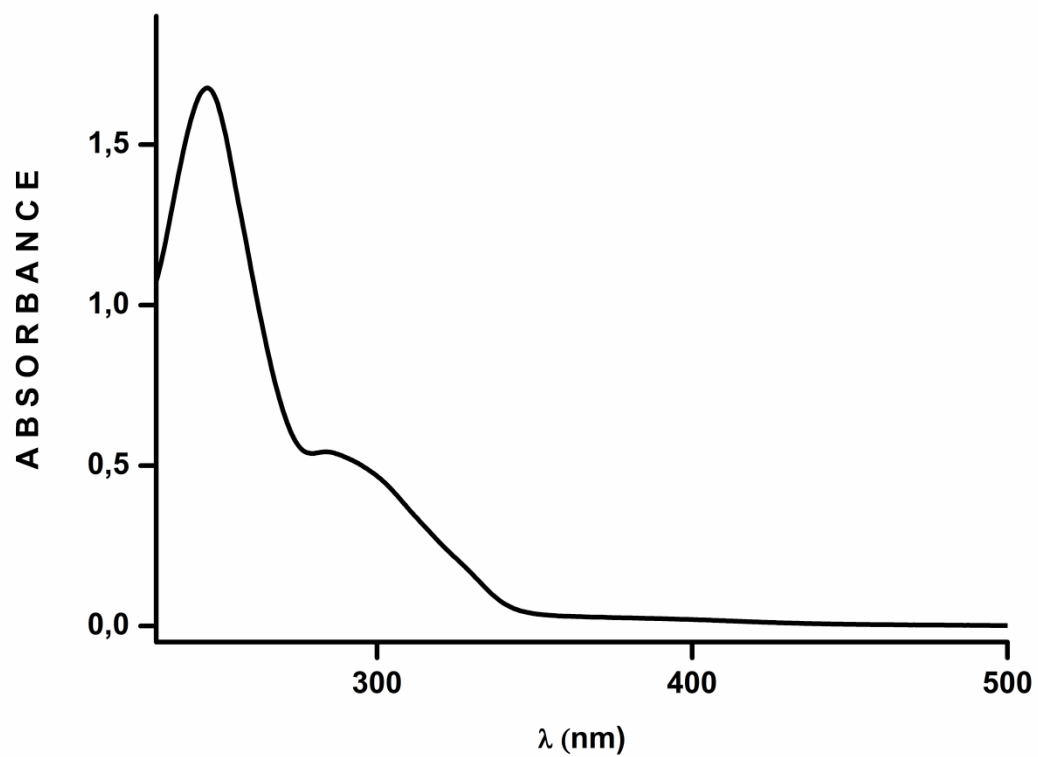

**Fig. S7.** Solution UV-vis spectrum of the complex [Fe(PzOx)<sub>3</sub>B(C<sub>6</sub>H<sub>5</sub>)Cl] in DMSO.



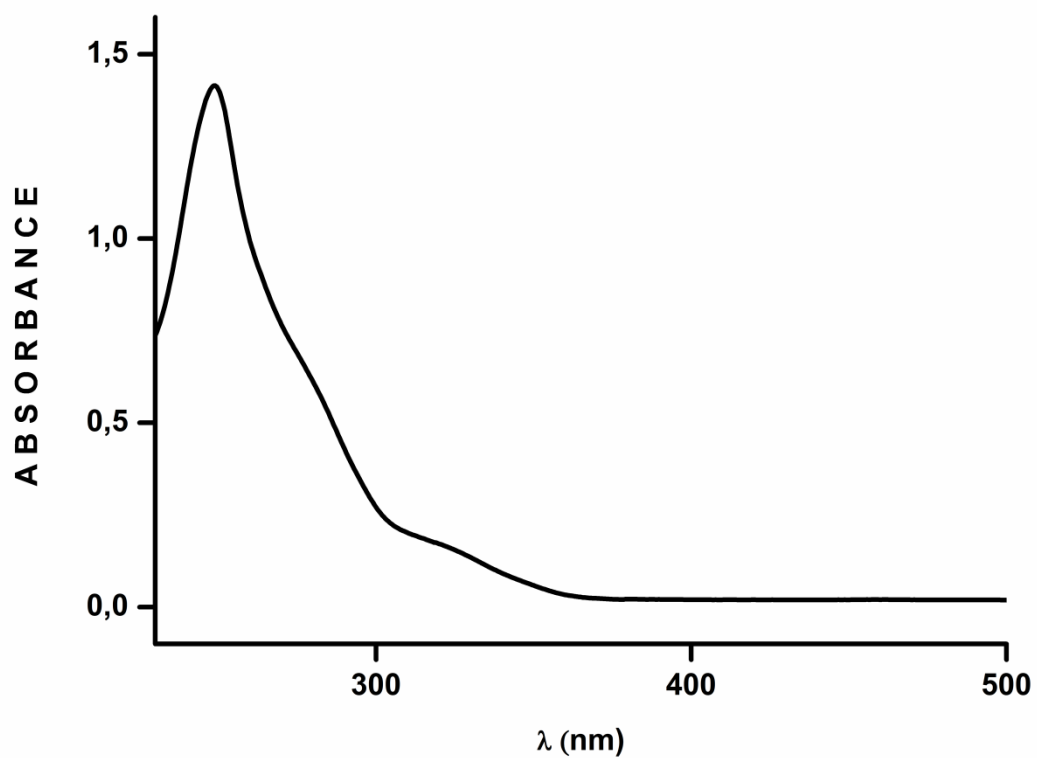

**Fig. S8.** Solution UV-vis spectrum of the complex [Co(PzOx)<sub>3</sub>B(C<sub>6</sub>H<sub>5</sub>)Cl] in DMSO.

**Table S4.** Main  $^{57}\text{Fe}$  Mössbauer parameters for the obtained binuclear hybrid iron(II) complexes and those for their mononuclear phenylboron-capped analog

| Compound                                                          | $\delta$    | $\Delta E_q$ | $\Gamma$ | Relative area<br>% | Assignment |
|-------------------------------------------------------------------|-------------|--------------|----------|--------------------|------------|
|                                                                   | <i>mm/s</i> |              |          |                    |            |
| [Fe(PzOx) <sub>3</sub> (BC <sub>6</sub> H <sub>5</sub> )Cl] [37d] | 0.99        | 3.55         | 0.28     | 76.7               | HS Fe(II)  |
| Fe <sup>3+</sup> -containing admixture [37d]                      | 0.41        | 0.72         | 0.57     | 23.3               | HS Fe(III) |
| [Fe(PzOx) <sub>3</sub> (HfPc)Cl]                                  | 0,99        | 3.11         | 0.29     | 100                | HS Fe(II)  |
| [Fe(PzOx) <sub>3</sub> (ZrPc)Cl]                                  | 1.00        | 3.11         | 0.24     | 100                | HS Fe(II)  |
