# Supplementary material for: Synthesis, structure and spectroelectrochemistry of hybrid metal(iv)phthalocyaninato-capped 3d-metal pyrazoloximates as prospective precursors of stimuli-induced (responsive) single-molecule magnets, logic gates and qubits
Source: Royal Society of Chemistry journal article supplement (doi:10.1039/d4nj02908a), 2024-01-01
Supplement: d4nj02908a2.pdf [file d4nj02908a2.pdf]

**Supporting Information**  
**for**  
**Synthesis, structure and (spectro)electrochemistry of hybrid**  
**metal(IV)phthalocyaninato-capped 3d-metal pyrazoloximates as prospective**  
**precursors of ET and/or optically operated stimuli-induced and stimuli-**  
**responsive single-molecule magnets, logic gates and qubits**

Svetlana A. Belova,<sup>a</sup> Semyon V. Dudkin,<sup>a</sup> Alexander S. Belov,<sup>a</sup> Anastasia A. Danshina,<sup>a,c</sup> Pavel V. Dorovatovskii,<sup>d</sup> Yulia H. Budnikova,<sup>e</sup> Vera V. Khrizanforova,<sup>e</sup> Svetlana Yu. Bratskaya,<sup>f</sup> Denis V. Balatskiy,<sup>f</sup> Yan Z. Voloshin<sup>a,b</sup>

<sup>a</sup>*Nesmeyanov Institute of Organoelement Compounds of the Russian Academy of Sciences, Vavilova str., bld. 1, 119334 Moscow, Russia*

<sup>b</sup>*Kurnakov Institute of General and Inorganic Chemistry of the Russian Academy of Sciences, 31 Leninsky pr., 119991 Moscow, Russia*

<sup>c</sup>*Moscow Center for Advanced Studies, 20 Kulakova Str., 123592, Moscow, Russia*

<sup>d</sup>*NRC Kurchatov Institute, 1 Kurchatova pl., 123098 Moscow, Russia*

<sup>e</sup>*Arbuzov Institute of Organic and Physical Chemistry of the Russian Academy of Sciences, 8 Arbuzov st., 420088 Kazan, Russia*

<sup>f</sup>*Institute of Chemistry, Far Eastern Branch of the Russian Academy of Sciences, 159 100-letiya Vladivostoka pr., 690022 Vladivostok, Russia*

\*Corresponding author E-mail: [voloshin@ineos.ac.ru](mailto:voloshin@ineos.ac.ru), [voloshin@igic.ras.ru](mailto:voloshin@igic.ras.ru)

*X-ray data***Table S1.** Details of data collection and refinement parameter for the X-rayed crystals of the bi- and pentanuclear hybrid complexes under study

| Parameter                                                                                           | [Fe(PzOx) <sub>3</sub> (ZrPc)Cl]·<br>·4CHCl <sub>3</sub>                             | [(Fe(PzOx) <sub>3</sub> (ZrPc)) <sub>2</sub> Fe]·<br>·8CH <sub>2</sub> Cl <sub>2</sub>                           | [Co(PzOx) <sub>3</sub> (ZrPc)Cl]Cl·<br>·C <sub>6</sub> H <sub>6</sub> ·2.2H <sub>2</sub> O | [(Co(PzOx) <sub>3</sub> (ZrPc)) <sub>2</sub> Co]·<br>·7CHCl <sub>3</sub>                                         |
|-----------------------------------------------------------------------------------------------------|--------------------------------------------------------------------------------------|------------------------------------------------------------------------------------------------------------------|--------------------------------------------------------------------------------------------|------------------------------------------------------------------------------------------------------------------|
| Empirical formula                                                                                   | C <sub>51</sub> H <sub>38</sub> Cl <sub>13</sub> FeN <sub>17</sub> O <sub>3</sub> Zr | C <sub>102</sub> H <sub>78</sub> Cl <sub>16</sub> Fe <sub>3</sub> N <sub>34</sub> O <sub>6</sub> Zr <sub>2</sub> | C <sub>53</sub> H <sub>44.4</sub> Cl <sub>2</sub> CoN <sub>17</sub> O <sub>5.2</sub> Zr    | C <sub>101</sub> H <sub>69</sub> Cl <sub>21</sub> Co <sub>3</sub> N <sub>34</sub> O <sub>6</sub> Zr <sub>2</sub> |
| Formula weight                                                                                      | 1544.90                                                                              | 2793.17                                                                                                          | 1223.70                                                                                    | 2958.58                                                                                                          |
| T, K                                                                                                | 100                                                                                  | 120                                                                                                              | 120                                                                                        | 100                                                                                                              |
| Crystal system                                                                                      | Triclinic                                                                            | Triclinic                                                                                                        | Triclinic                                                                                  | Triclinic                                                                                                        |
| Space group                                                                                         | <i>P</i> -1                                                                          | <i>P</i> -1                                                                                                      | <i>P</i> -1                                                                                | <i>P</i> -1                                                                                                      |
| Z                                                                                                   | 4                                                                                    | 1                                                                                                                | 2                                                                                          | 1                                                                                                                |
| a, Å                                                                                                | 12.7743(5)                                                                           | 12.632(2)                                                                                                        | 11.2098(17)                                                                                | 12.541(3)                                                                                                        |
| b, Å                                                                                                | 20.9149(8)                                                                           | 13.972(3)                                                                                                        | 15.554(2)                                                                                  | 13.436(3)                                                                                                        |
| c, Å                                                                                                | 24.0058(9)                                                                           | 15.789(3)                                                                                                        | 15.734(2)                                                                                  | 17.462(4)                                                                                                        |
| α, °                                                                                                | 105.651(2)                                                                           | 97.067(5)                                                                                                        | 81.418(9)                                                                                  | 84.63(3)                                                                                                         |
| β, °                                                                                                | 94.089(2)                                                                            | 101.196(5)                                                                                                       | 72.559(9)                                                                                  | 76.91(3)                                                                                                         |
| γ, °                                                                                                | 94.732(2)                                                                            | 92.140(5)                                                                                                        | 79.554(9)                                                                                  | 79.80(3)                                                                                                         |
| V, Å <sup>3</sup>                                                                                   | 6125.5(4)                                                                            | 2707.4(9)                                                                                                        | 2560.6(7)                                                                                  | 2816.3(11)                                                                                                       |
| D <sub>calc</sub> (g cm <sup>-3</sup> )                                                             | 1.675                                                                                | 1.713                                                                                                            | 1.587                                                                                      | 1.744                                                                                                            |
| Linear absorption, μ,<br>cm <sup>-3</sup>                                                           | 10.33                                                                                | 10.47                                                                                                            | 7.01                                                                                       | 13.4                                                                                                             |
| F(000)                                                                                              | 3096                                                                                 | 1406                                                                                                             | 1248                                                                                       | 1479                                                                                                             |
| 2θ <sub>max</sub> , °                                                                               | 50                                                                                   | 50                                                                                                               | 50.5                                                                                       | 53                                                                                                               |
| Reflections<br>measured                                                                             | 55033                                                                                | 22663                                                                                                            | 16785                                                                                      | 20552                                                                                                            |
| Independent<br>reflections                                                                          | 21513                                                                                | 9369                                                                                                             | 9022                                                                                       | 9626                                                                                                             |
| Observed refls ( <i>I</i> ><br>2σ( <i>I</i> ))                                                      | 12568                                                                                | 3327                                                                                                             | 5516                                                                                       | 5872                                                                                                             |
| Parameters                                                                                          | 1410                                                                                 | 713                                                                                                              | 697                                                                                        | 691                                                                                                              |
| R1                                                                                                  | 0.0796                                                                               | 0.0952                                                                                                           | 0.0991                                                                                     | 0.1531                                                                                                           |
| wR2                                                                                                 | 0.2444                                                                               | 0.2794                                                                                                           | 0.3002                                                                                     | 0.4304                                                                                                           |
| GOF Goodness-of-<br>fit                                                                             | 1.037                                                                                | 0.968                                                                                                            | 1.054                                                                                      | 1.488                                                                                                            |
| Largest diff.<br>peak/hole, e <sup>-</sup> Å <sup>-3</sup><br>(d <sub>max</sub> /d <sub>min</sub> ) | 1.123/-1.283                                                                         | 1.061/-0.770                                                                                                     | 2.428/-2.156                                                                               | 4.530/-1.522                                                                                                     |
| CCDC number                                                                                         | 2347219                                                                              | 2347217                                                                                                          | 2347218                                                                                    | 2347216                                                                                                          |

**Table S2.** Symmetry measures<sup>a</sup> of the *3d*-metal-centered  $MN_6$ -polyhedra in the molecules of the bi- and pentanuclear hybrid complexes under study

| Parameter | [Fe(PzOx) <sub>3</sub> (ZrPc)Cl] | [(Fe(PzOx) <sub>3</sub> (ZrPc)) <sub>2</sub> Fe] |                  | [Co(PzOx) <sub>3</sub> (ZrPc)Cl]Cl | [(Co(PzOx) <sub>3</sub> (ZrPc)) <sub>2</sub> Co] |                  |
|-----------|----------------------------------|--------------------------------------------------|------------------|------------------------------------|--------------------------------------------------|------------------|
|           | Fe <sup>2+</sup>                 | Fe <sup>3+</sup>                                 | Fe <sup>2+</sup> | Co <sup>3+</sup>                   | Co <sup>3+</sup>                                 | Co <sup>2+</sup> |
| S(HP-6)   | 33.276                           | 33.665                                           | 31.087           | 31.818                             | 33.566                                           | 32.137           |
| S(PPY-6)  | 23.533                           | 20.557                                           | 29.312           | 25.739                             | 22.653                                           | 29.826           |
| S(TAP-6)  | 1.652                            | 3.354                                            | 0.111            | 0.884                              | 2.017                                            | 0.080            |
| S(TRP-6)  | 9.727                            | 6.092                                            | 16.160           | 12.024                             | 7.852                                            | 16.023           |
| S(JPPY-6) | 27.165                           | 24.417                                           | 32.709           | 29.507                             | 26.532                                           | 33.246           |

<sup>a</sup>S(HP-6), S(PPY-6), S(TAP-6), S(TRP-6) and S(JPPY-6) are the calculated deviations of a geometry of their  $FeN_6$ - and  $CoN_6$ -polyhedra from an ideal hexagon (HP-6), pentagonal pyramid (PPY-6), trigonal antiprism (TAP-6), trigonal prism (TPR-6) and Johnson pentagonal pyramid (JPPY-6), respectively

**Table S3.** Symmetry measures of the capping  $ZnN_4O_3$ -polyhedra in the molecules of the bi- and pentanuclear hybrid complexes under study

| Parameter  | [Fe(PzOx) <sub>3</sub> (ZrPc)Cl] | [(Fe(PzOx) <sub>3</sub> (ZrPc)) <sub>2</sub> Fe] | [Co(PzOx) <sub>3</sub> (ZrPc)Cl]Cl | [(Co(PzOx) <sub>3</sub> (ZrPc)) <sub>2</sub> Co] |
|------------|----------------------------------|--------------------------------------------------|------------------------------------|--------------------------------------------------|
| S(HP-7)    | 33.772                           | 35.012                                           | 33.488                             | 34.450                                           |
| S(HPY-7)   | 19.534                           | 19.658                                           | 20.232                             | 19.848                                           |
| S(PBPY-7)  | 5.949                            | 5.946                                            | 6.731                              | 6.115                                            |
| S(COC-7)   | 0.707                            | 0.575                                            | 1.674                              | 0.708                                            |
| S(CTPR-7)  | 0.966                            | 1.489                                            | 0.372                              | 0.884                                            |
| S(JPBPY-7) | 9.666                            | 9.400                                            | 10.389                             | 9.695                                            |
| S(JETPY-7) | 20.242                           | 20.244                                           | 20.314                             | 19.704                                           |

<sup>a</sup>S(HP-7), S(HPY-7), S(PBPY-7), S(COC-7), S(CTPR-7), S(JPBPY-7) and S(JETPY-7) are the calculated deviations of a geometry of the  $ZrO_3N_4$ -polyhedron from an ideal heptagon (HP-7), hexagonal pyramid (HPY-7), pentagonal bipyramid (PBPY-7), capped octahedron (COC-7), capped trigonal prism (CTPR-7), Johnson pentagonal bipyramid (JPPY-6) and Elongated triangular pyramid (JETPY-7), respectively.

As requested by one of the Reviewers of this paper, the detailed comments are given below to explain the Alerts that arise from the not so high quality of X-ray diffraction data collected for each of the four complexes synthesized (Alerts A and B are also explained in the provided cif and checkcif files). In all cases, however, the resulting quality is still high enough to unambiguously support the conclusions drawn from these data in the paper.

Table S5.

| <b>Number of components</b> | <b>R1</b> | <b>wR2</b> | <b>GOOF</b> | <b><math>\rho_{\max}</math></b> | <b><math>\rho_{\min}</math></b> | <b>Occupancies</b>                       |
|-----------------------------|-----------|------------|-------------|---------------------------------|---------------------------------|------------------------------------------|
| 1                           | 0.0796    | 0.2444     | 1.037       | 1.123                           | -1.283                          | 1.0                                      |
| 2                           | 0.0789    | 0.2415     | 1.035       | 1.124                           | -1.283                          | 0.87302<br>0.12698                       |
| 3                           | 0.0785    | 0.2391     | 1.034       | 1.115                           | -1.267                          | 0.77671<br>0.11247<br>0.10943            |
| 4                           | 0.0783    | 0.2390     | 1.032       | 1.122                           | -1.269                          | 0.73364<br>0.09902<br>0.09785<br>0.06833 |

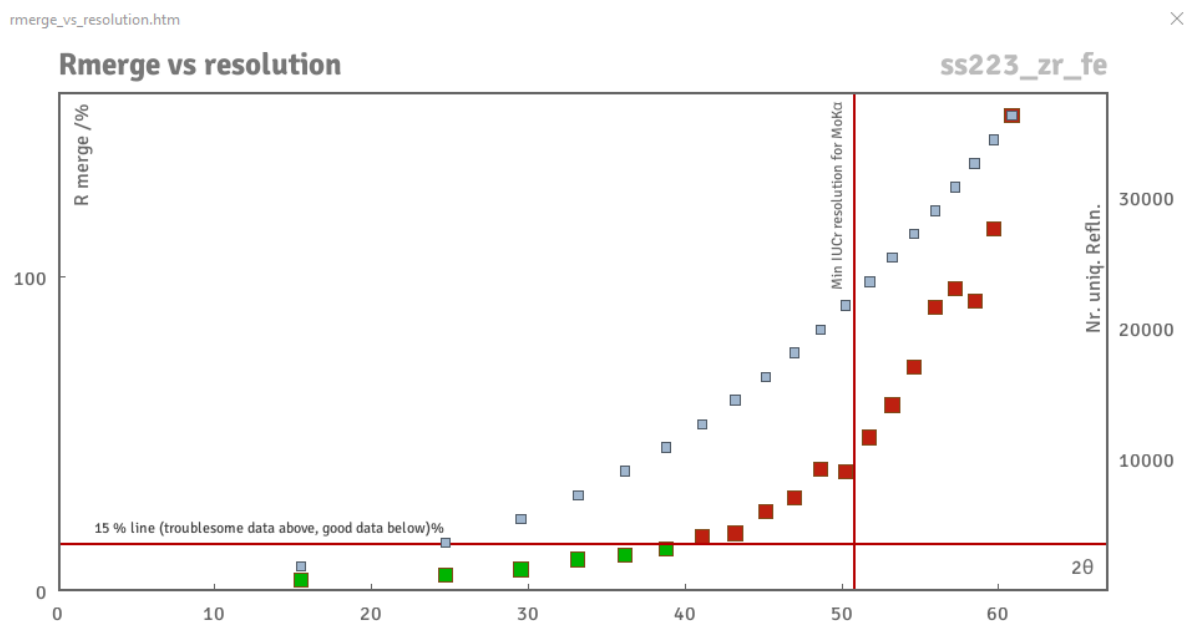

Current level: 0.654

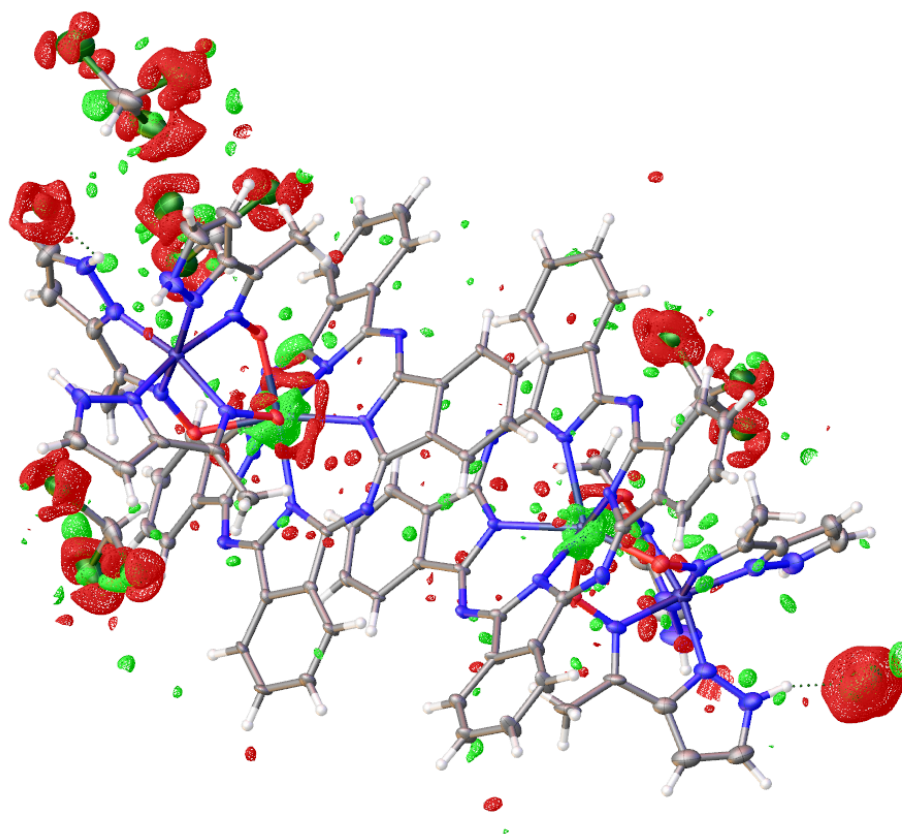

Fig. S9.  $R_{\text{merge}}$  vs. resolution plot (on top) and the residual electron density distribution (on bottom) for the model with only one position of Cl2 being populated.

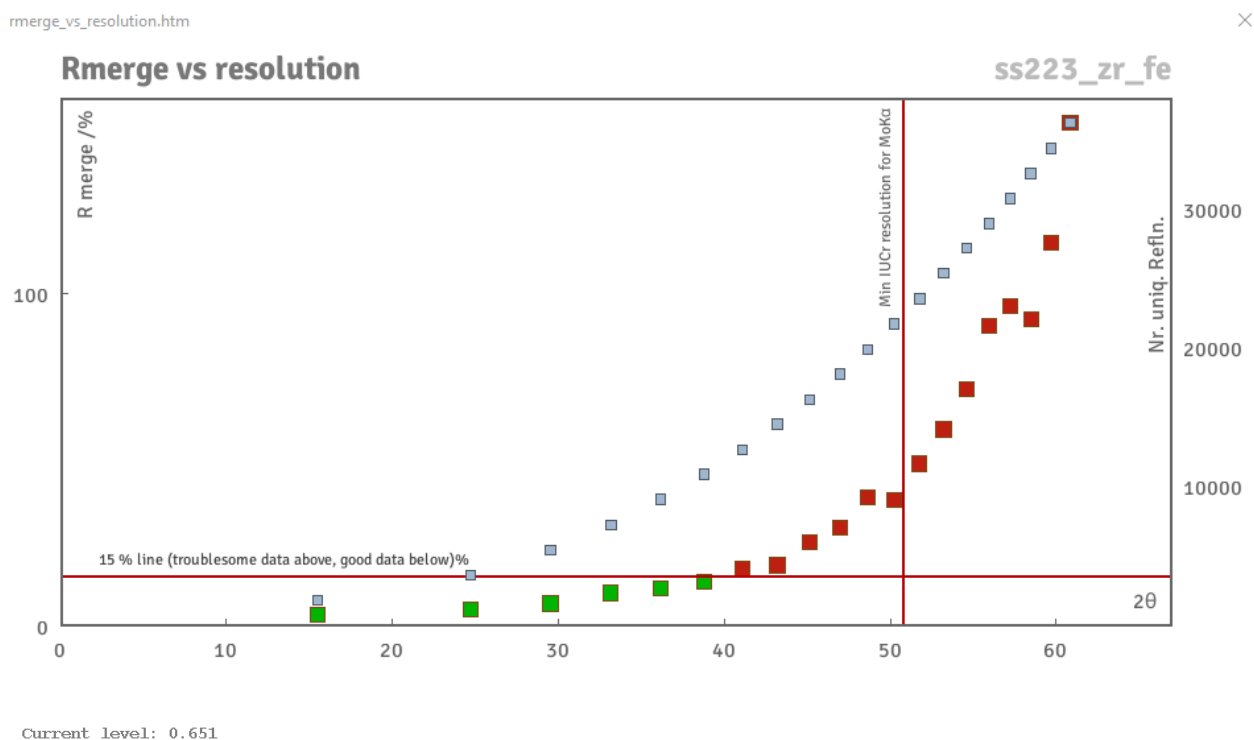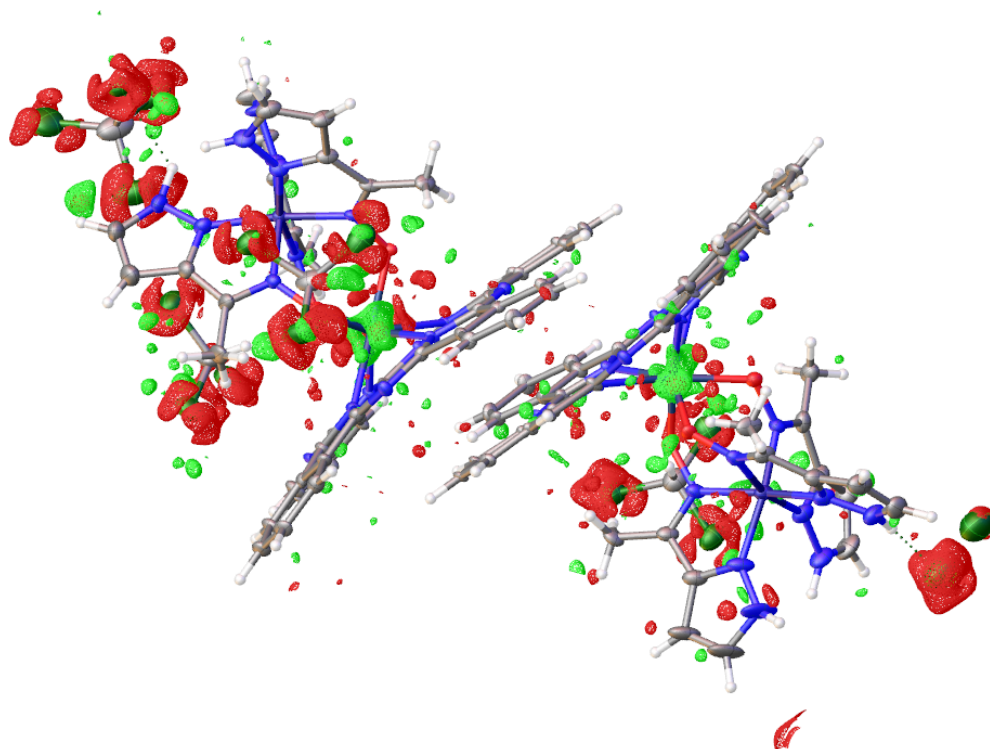

Fig. S10.  $R_{\text{merge}}$  vs. resolution plot (on top) and the residual electron density distribution (on bottom) for the model with Cl2 being disordered by two positions (for their populations, see Table S1).

rmerge\_vs\_resolution.htm

x

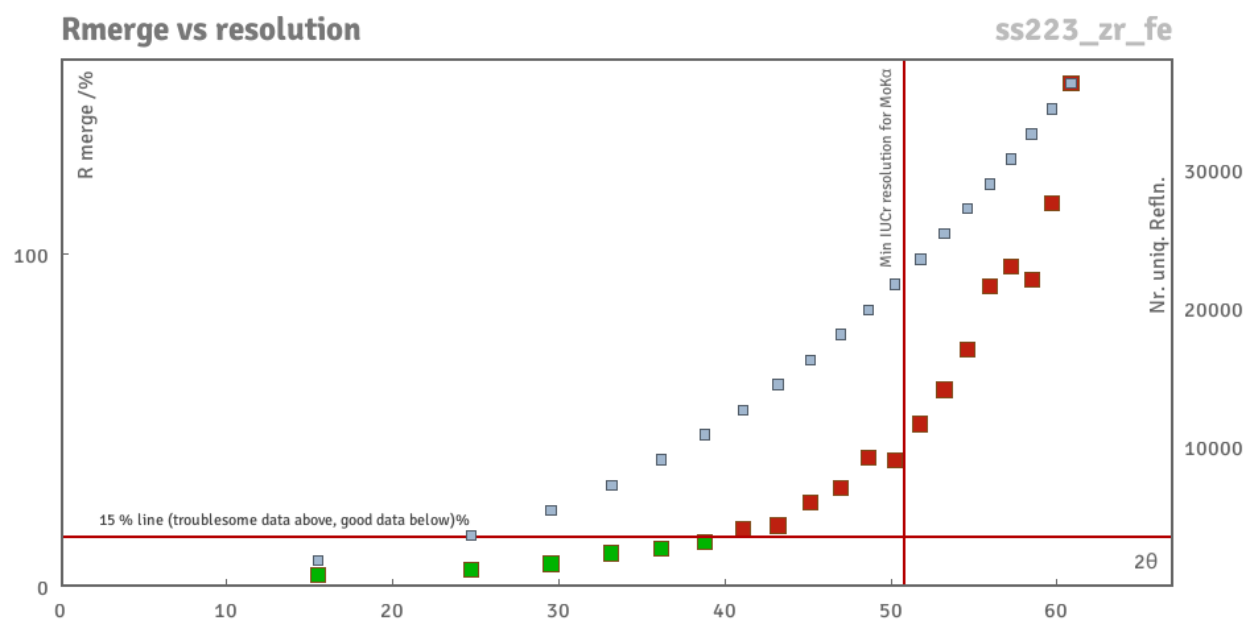

Current level: 0.648

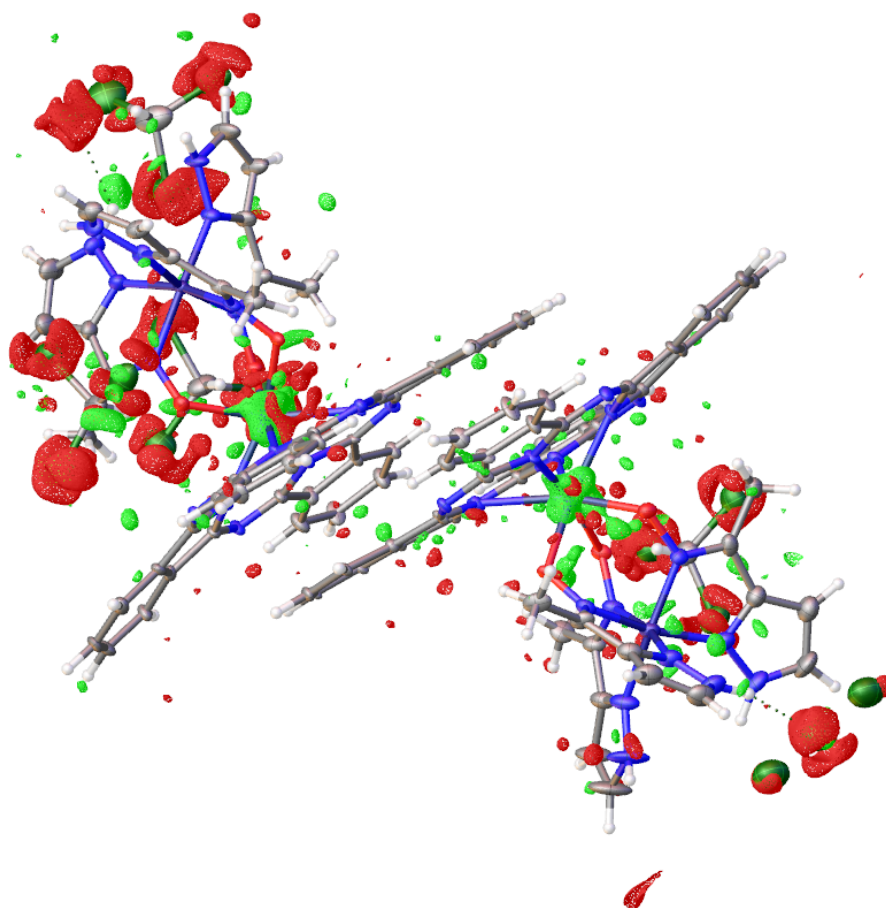

Fig. S11.  $R_{\text{merge}}$  vs. resolution plot (on top) and the residual electron density distribution (on bottom) for the model with C12 being disordered by three positions (for their populations, see Table S1).



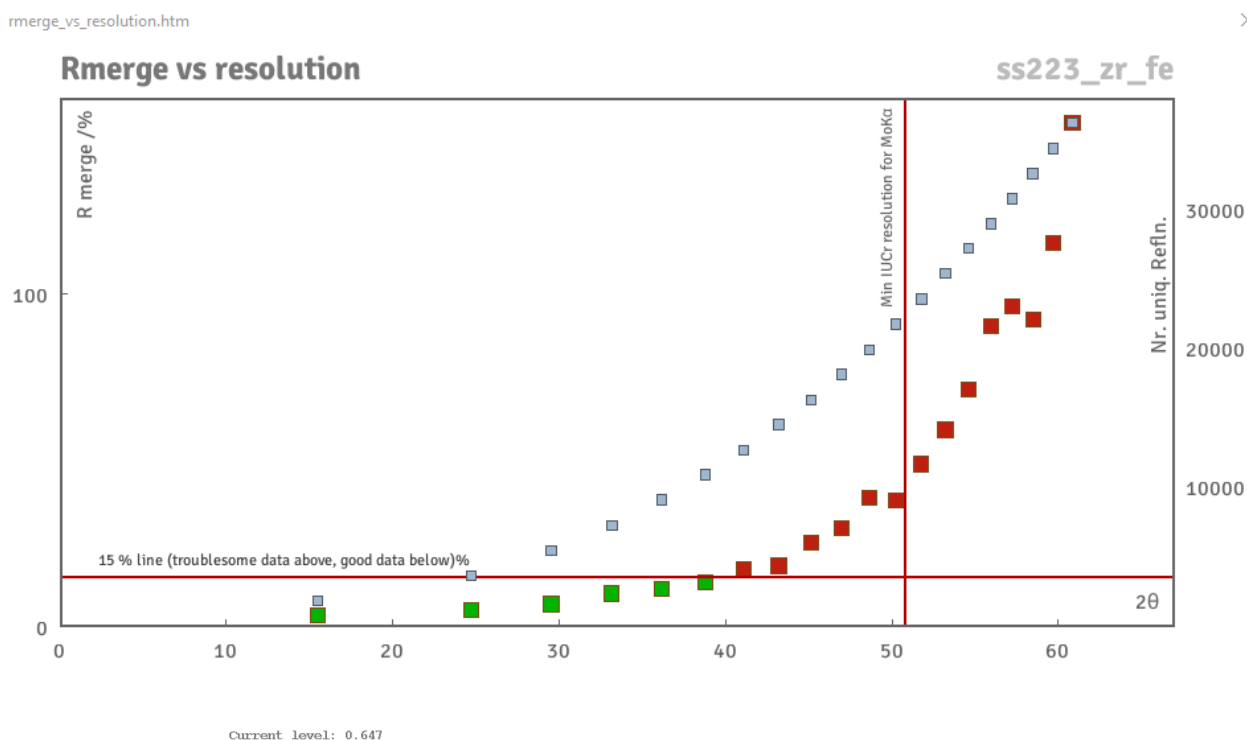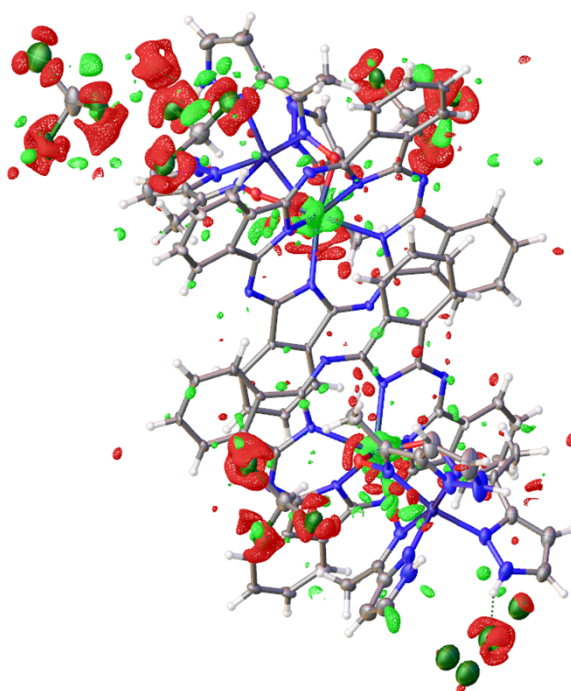

Fig. S12.  $R_{\text{merge}}$  vs. resolution plot (on top) and the residual electron density distribution (on bottom) for the model with Cl2 being disordered by two positions (for their populations, see Table S1).

**CCDC 2347216:** C101 H69 Cl21 Co3 N34 O6 Zr2

971\_ALERT\_2\_A Check Calcd Resid. Dens. 0.93Ang From Zr1 5.64 eA-3

971\_ALERT\_2\_A Check Calcd Resid. Dens. 0.87Ang From Zr1 5.04 eA-3

971\_ALERT\_2\_A Check Calcd Resid. Dens. 1.48Ang From N15 5.04 eA-3

971\_ALERT\_2\_A Check Calcd Resid. Dens. 0.87Ang From N5 4.55 eA-3

971\_ALERT\_2\_A Check Calcd Resid. Dens. 0.95Ang From N2 4.36 eA-3

973\_ALERT\_2\_A Check Calcd Positive Resid. Density on Zr1 2.70 eA-3

084\_ALERT\_3\_B High wR2 Value (i.e. > 0.25) ..... 0.43 Report

097\_ALERT\_2\_B Large Reported Max. (Positive) Residual Density 4.53 eA-3

971\_ALERT\_2\_B Check Calcd Resid. Dens. 1.21Ang From N11 3.12 eA-3

971\_ALERT\_2\_B Check Calcd Resid. Dens. 1.00Ang From C2 3.05 eA-3

971\_ALERT\_2\_B Check Calcd Resid. Dens. 1.09Ang From Cl07 3.03 eA-3

971\_ALERT\_2\_B Check Calcd Resid. Dens. 1.04Ang From Co2 3.02 eA-3

The crystal size is reported as 0.07 x 0.07 x 0.01 mm.

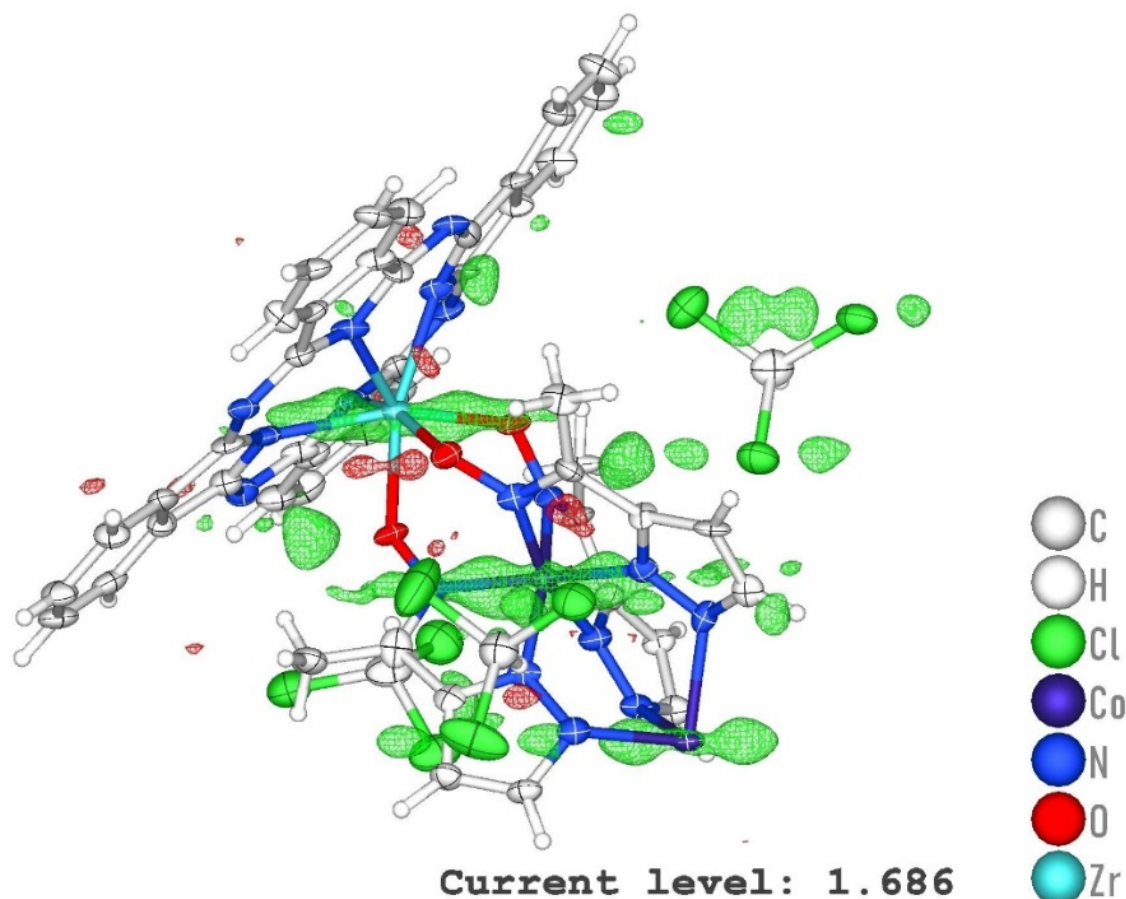

The best available single crystal of this complex (**CCDC 2347216**), selected for the X-ray data collection, was a small and thin plate with low reflective power that suffered from twinning (although a sensible twin law was not found), thereby causing the collected dataset to be of the mediocre quality. The latter, however, is still enough to discuss general structural details, as is done in the paper.

Although there is a chance that after many new attempts at recrystallization a crystal with a superior quality could be obtained, slightly lower R-factors and other quality indicators and smaller e.s.d's on the reported geometric parameters with conceptually the same conclusions drawn from them do not warrant such addition efforts, which still can fail, as did all the previous attempts at recrystallization.

## CCDC 2347217: C102 H78 Cl16 Fe3 N34 O6 Zr2

020\_ALERT\_3\_B The Value of Rint is Greater Than 0.12 ..... 0.227 Report

026\_ALERT\_3\_B Ratio Observed / Unique Reflections (too) Low .. 36%

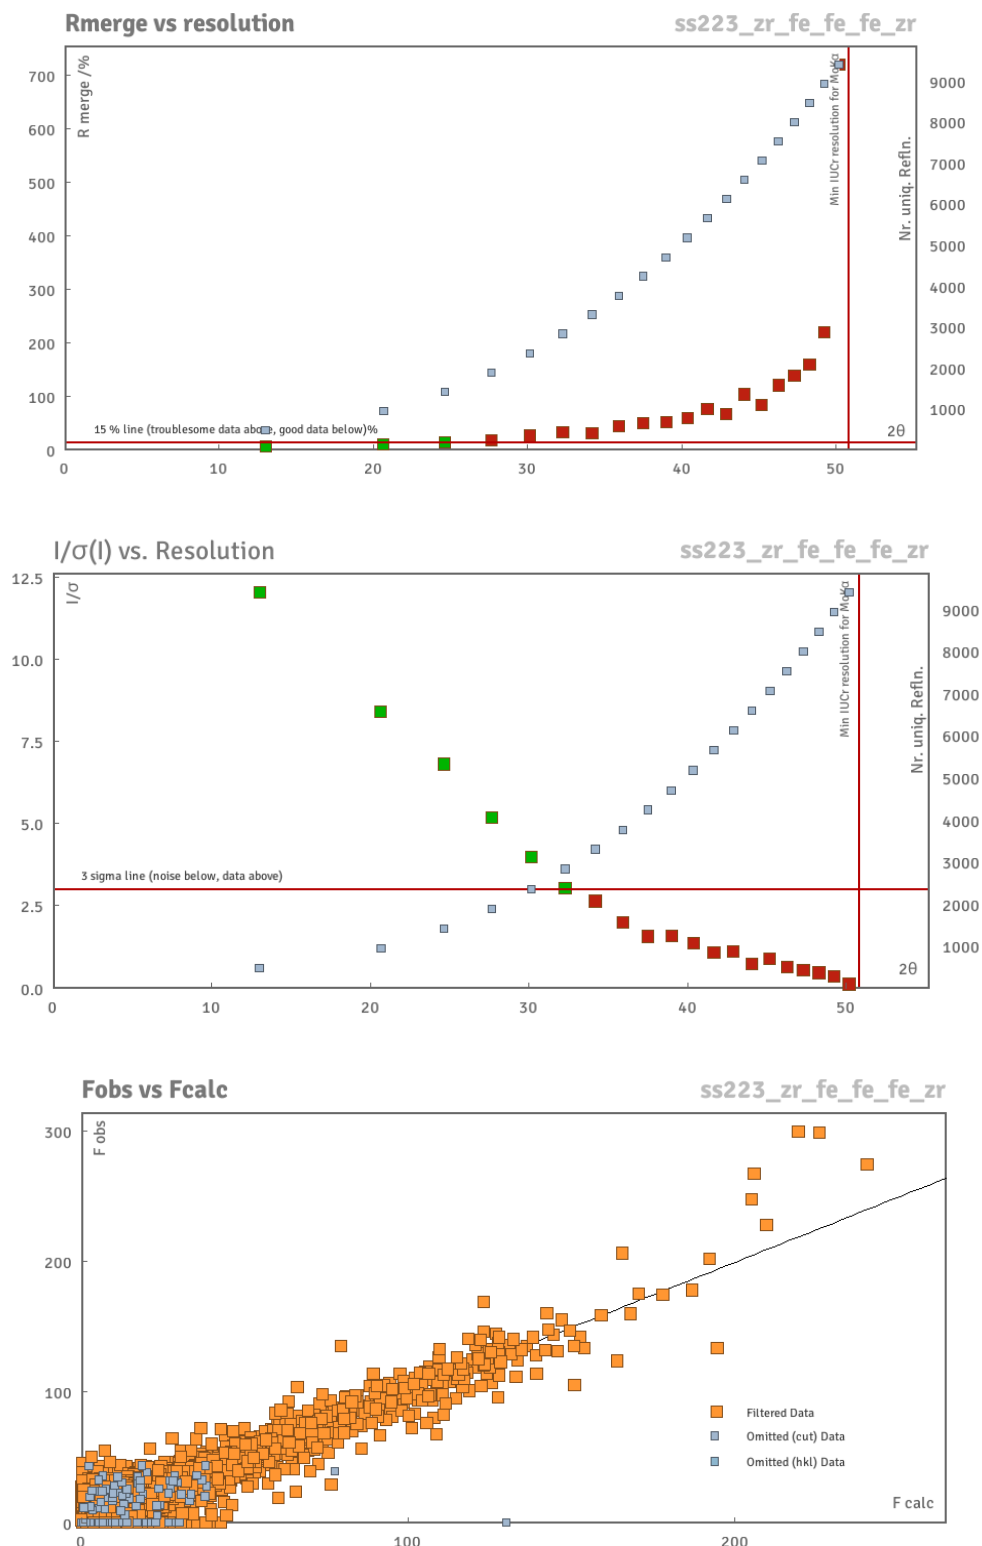

The best available single crystal of this complex (CCDC 2347217) selected for the X-ray data collection was a small and thin plate with low reflective power, thereby causing the collected dataset to be of the mediocre quality. The latter, however, is still enough to discuss general structural details, as is done in the paper.

Although there is a chance that after many new attempts at recrystallization a crystal with a superior quality could be obtained, slightly lower R-factors and other quality indicators and smaller e.s.d's on the reported geometric parameters with conceptually the same conclusions drawn from them do not warrant such addition efforts, which still can fail, as did all the previous attempts at recrystallization.

CCDC 2347218: C<sub>53</sub> H<sub>40</sub> Cl<sub>2</sub> Co N<sub>17</sub> O<sub>3</sub> Zr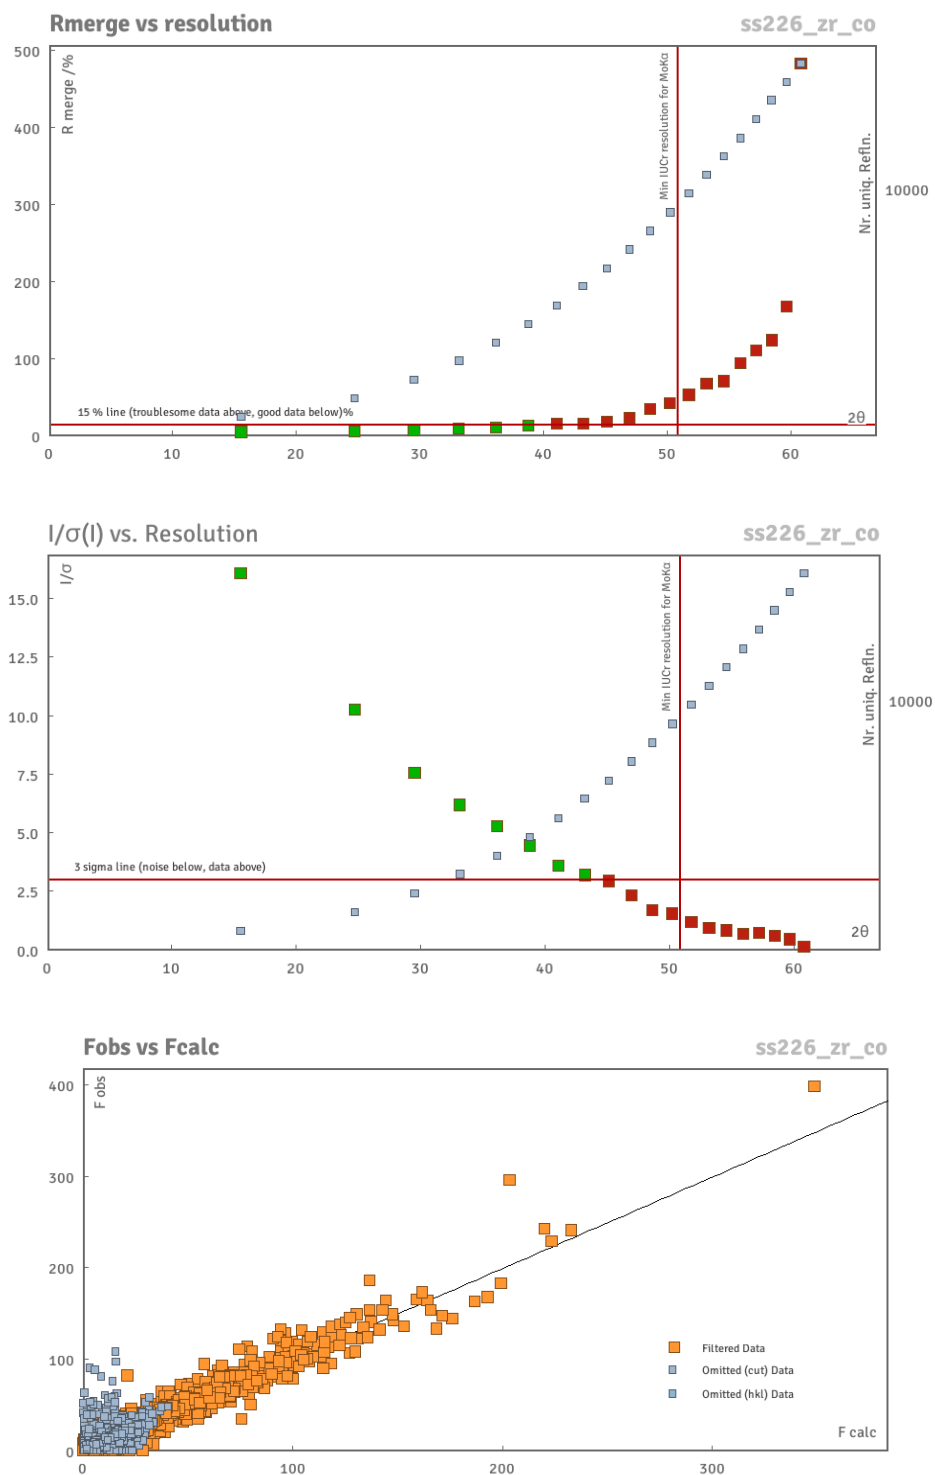

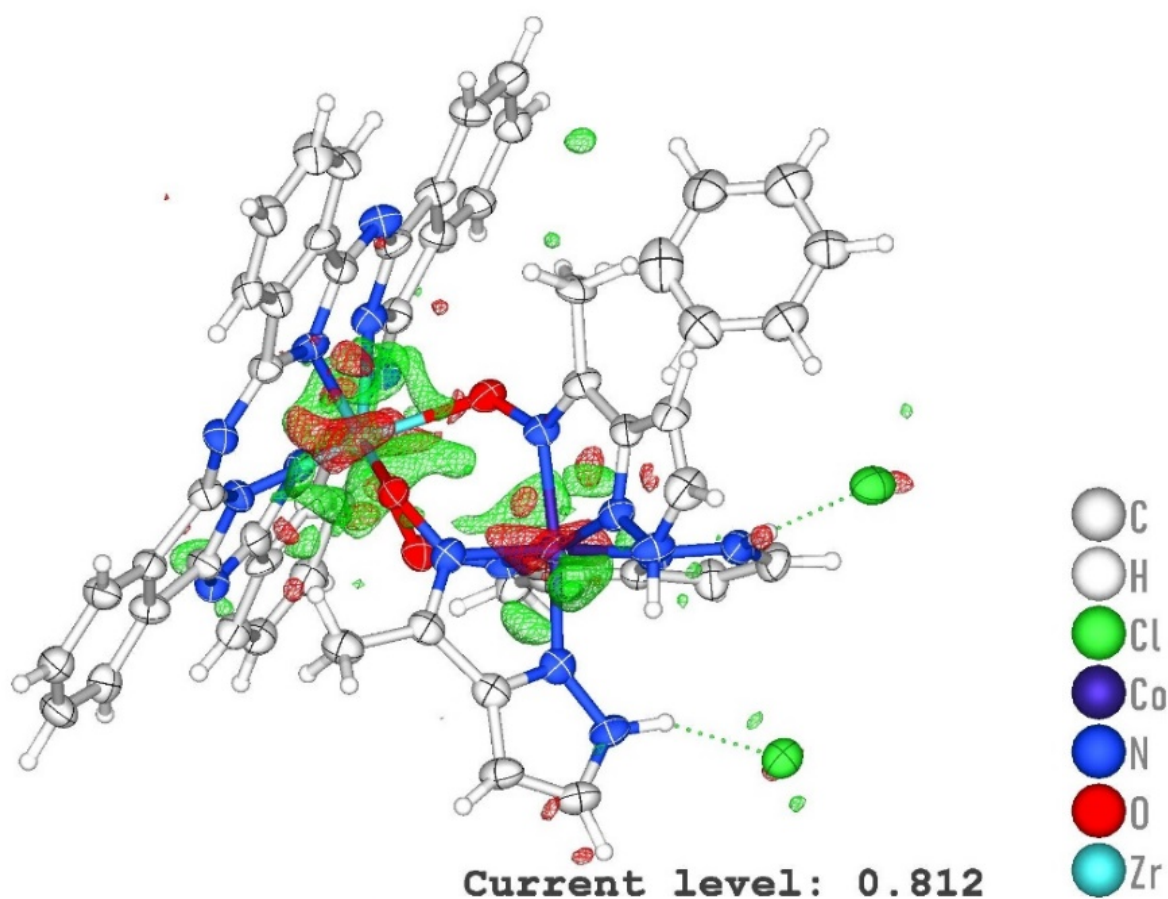

Like other members from this hard-to-crystallize family of polynuclear intracomplexes, the best available single crystal for this complex (CCDC 2347218) was a small and thin plate. The quality of the collected dataset is again on the lower side, it, however, even does not produce alerts A or B.

Although there is also a chance that after many new attempts at recrystallization a crystal with a superior quality could be obtained, slightly lower R-factors and other quality indicators and smaller e.s.d's on the reported geometric parameters with conceptually the same conclusions drawn from them do not warrant such addition efforts, which still can fail, as did all the previous attempts at recrystallization.

CCDC 2347219: C<sub>49</sub> H<sub>36</sub> Cl<sub>7</sub> Fe N<sub>17</sub> O<sub>3</sub> Zr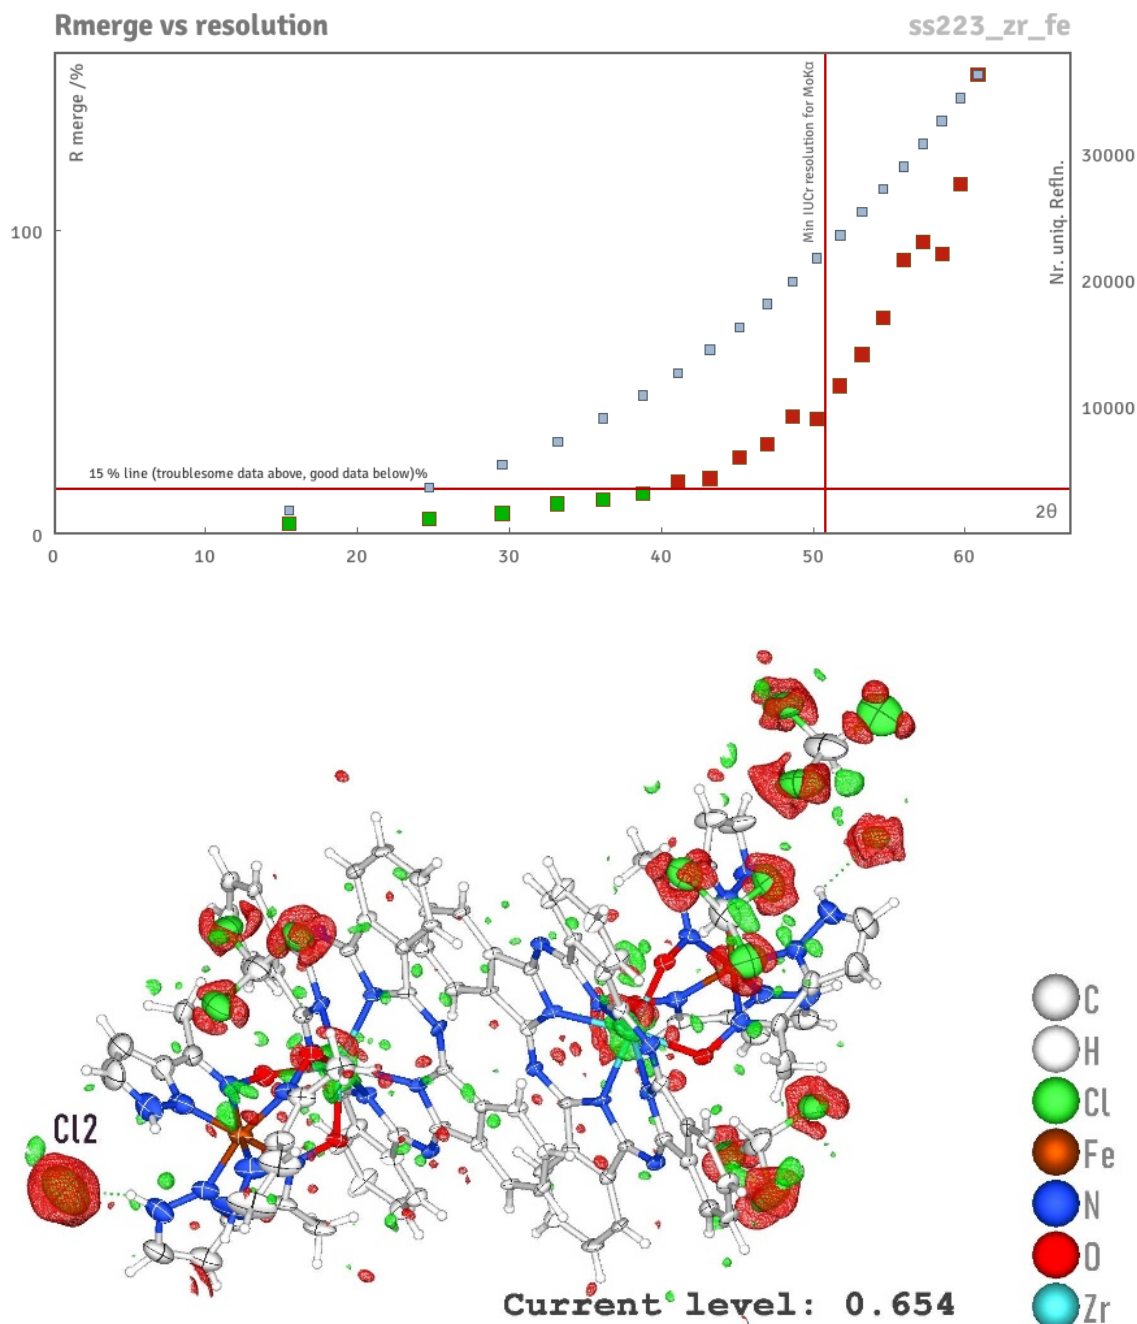

Like other members from this hard-to-crystallize family of polynuclear intracomplexes, the best available single crystal for this complex (CCDC 2347219) was a small and thin plate. The quality of the collected dataset is again on the lower side, it, however, even does not produce alerts A or B.

Although there is a chance that after many new attempts at recrystallization a crystal with a superior quality could be obtained, slightly lower R-factors and other quality indicators and smaller e.s.d's on the reported geometric parameters with



conceptually the same conclusions drawn from them do not warrant such additional efforts, which still can fail, as did all the previous attempts at recrystallization.

Also note the thermal ellipsoid of the atom Cl2 that is larger than for other chloride anions, which, however, does not produce alerts A or B. As this cannot arise from a superposition with a neutral molecule (otherwise, the crystal won't be charge neutral, thus containing the intracomplex species), the most probable reason is the disorder of Cl2. Our attempts to model it with two, three and four positions with freely refined populations, however, resulted only in minor changes in R-factors and other quality indicators, thereby making its modelling superfluous.
